# Supplementary material for: Genome-Wide Association Analysis Identifies a Genetic Basis of Infectivity in a Model Bacterial Pathogen
Source: PubMed Central journal article supplement — Mol Biol Evol. 2020 Jul 13;37(12):3439–52. doi: 10.1093/molbev/msaa173 (PMC7743900; doi:10.1093/molbev/msaa173), 2020-07-13
Supplement: msaa173_supplementary_data.pdf [file msaa173_supplementary_data.pdf]

**Supplementary Figure 1:** Quantile-quantile (QQ) plot of observed versus expected p-values from the treeWAS “terminal” tests a) including all values, b) with values in the Pcl7 gene region removed. QQ plots excluding causal polymorphisms are expected to fall approximately along the  $y=x$  line.

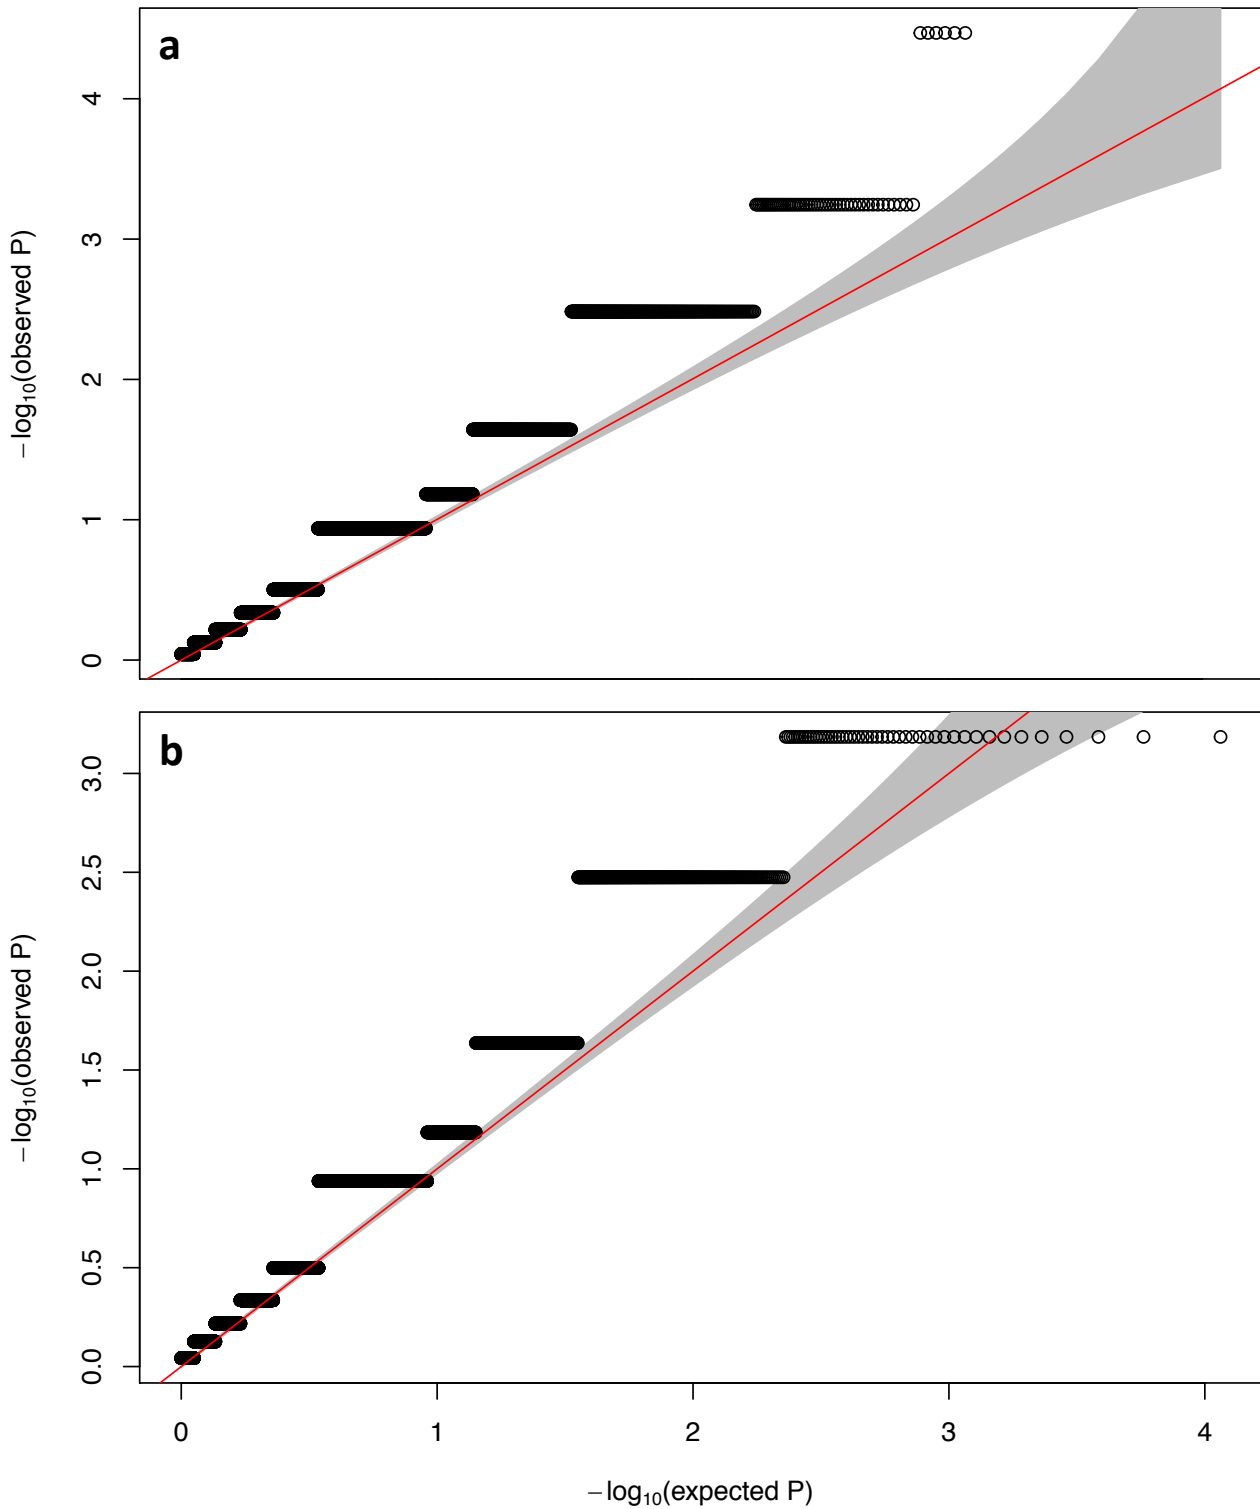







































**Supplementary Figure 3: Nucleotide alignment and ORF translation of partial Pcl7 sequence containing infectotype-associated polymorphisms.** Designated haplotypes are based on polymorphisms in this region of sequence only. Notations after haplotype name signify the polymorphism-associated infectotype (+ or -) and the number of *P. ramosa* clones with that haplotype. Nucleotide coordinates correspond to the full gene alignment positions detailed in Table 1 and Supplementary Figure 1. Colors in sequences highlight nucleotide and amino acid polymorphisms. Running bar graph at header depicts degree of sequence identity across samples, with green indicating the same base across all sequences, yellow indicating less than complete identity, and red indicating very low identity for the given position.

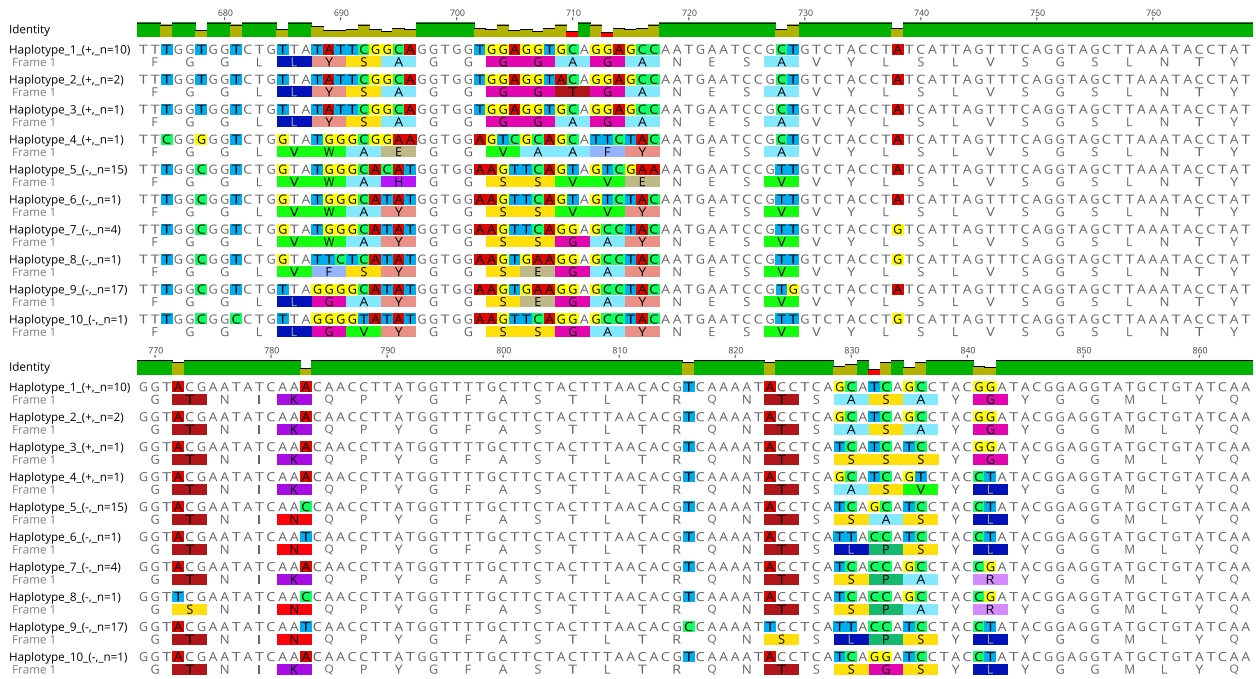



**Supplementary Figure 3:** a) Structural model and corresponding quality scores of C-terminal globular domain of Pcl7 homotrimer, based on alignment with BclA. Colors correspond to the QMEAN score, with purple indicating a high-quality local alignment and orange indicating a low-quality local alignment. b) Predicted local similarity of Pcl7 query sequence to BclA target sequence. c) Alignment of Pcl7 translated sequence to BclA target sequence, with same alignment-quality color scheme as Panel a.

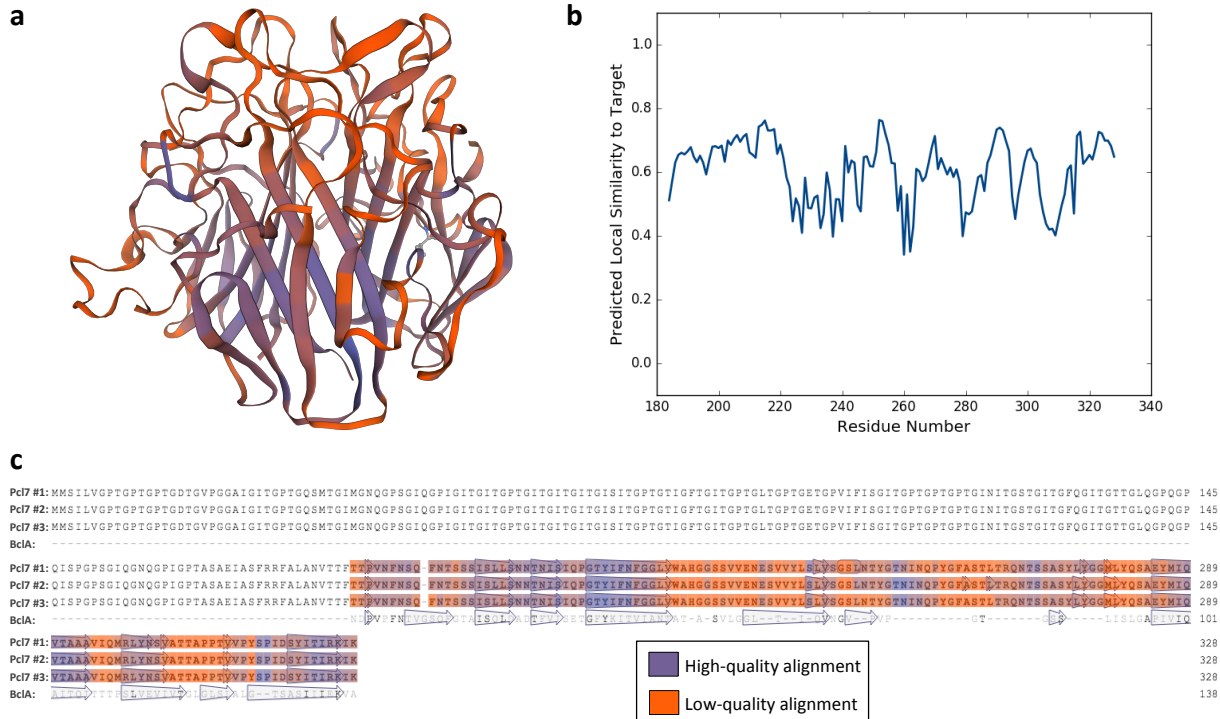



**Supplementary Figure 4:** Phylogenies of all 56 clones in the *P. ramosa* diversity panel (24 genome-sequenced clones plus 32 additional clones), based on the full coding sequence of the Pcl7 gene. Red branch tips indicate clones that were infectious to host phenotype HU-HO-2/CH-H-67, and black branch tips indicate non-infectious clones.

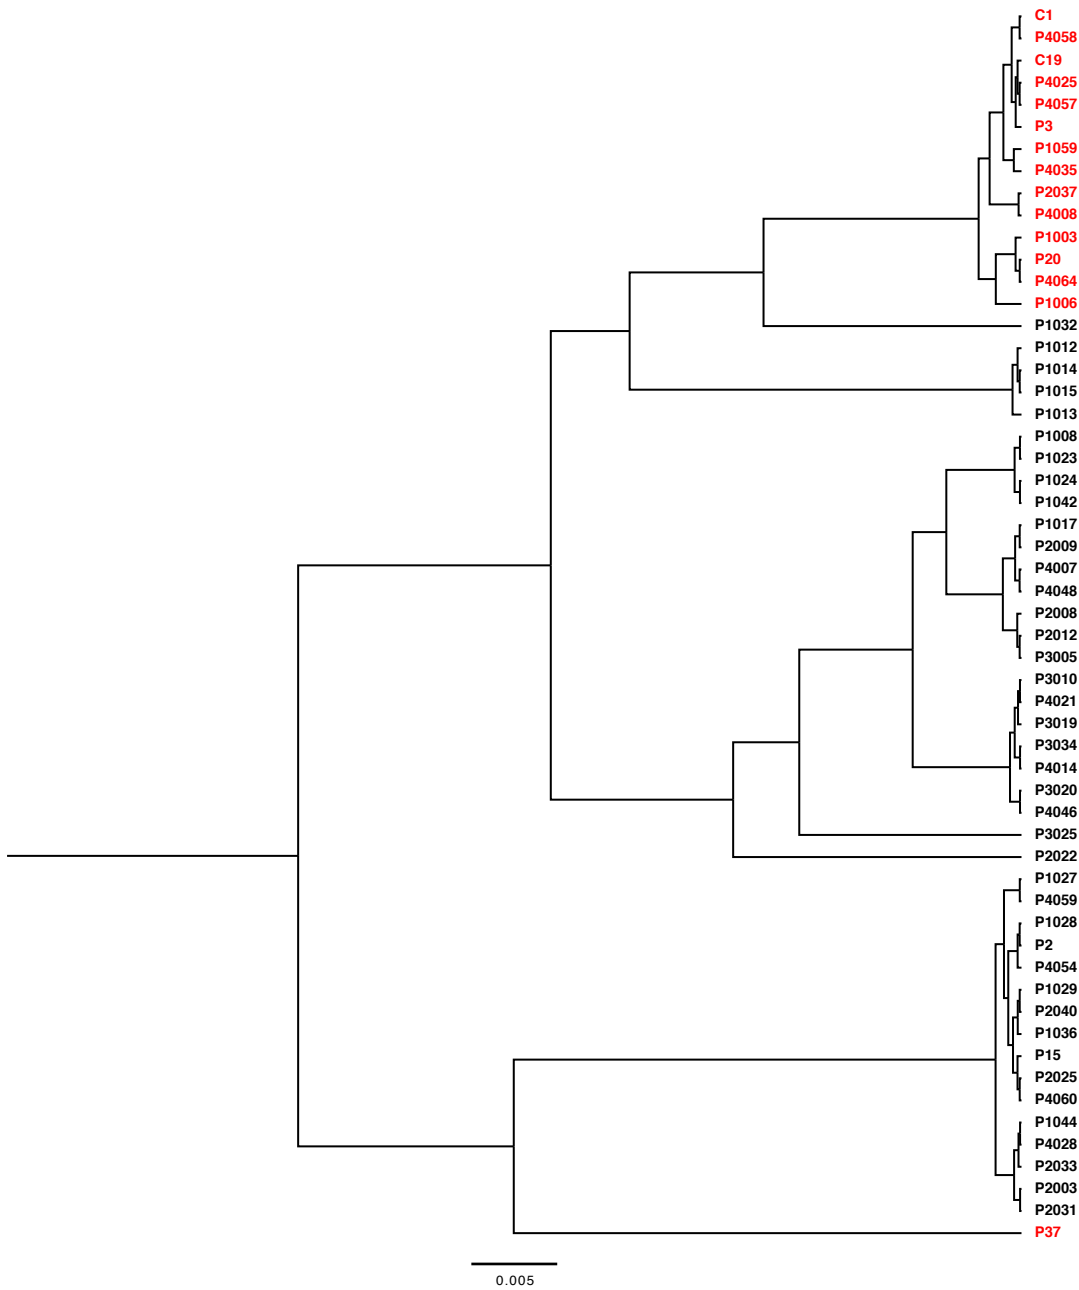



**Supplementary Table 1:** Details of the 56 *P. ramosa* clones included in this study, including name, locality of origin, GPS coordinates, and infection phenotypes.

| Clone | Locality | Country/Region | Lat, Long      | Sequencing   | HU-HO-2/CH-H-67 | FI-XINB3 | FI-KELA-39-9 |
|-------|----------|----------------|----------------|--------------|-----------------|----------|--------------|
| C1    | RU-M2    | Russia         | 55.728, 37.556 | Whole Genome | 1               | 0        | 1            |
| C19   | DE-G1    | Germany        | 54.282, 10.966 | Whole Genome | 1               | 1        | 0            |
| P20   | CH-H     | Switzerland    | 47.558, 8.863  | Whole Genome | 1               | 0        | 0            |
| P4035 | DE-R1    | Germany        | 54.207, 10.406 | Whole Genome | 1               | 0        | 0            |
| P4057 | FI-VW5   | Finland        | 59.83, 23.201  | Whole Genome | 1               | 0        | 1            |
| P4064 | CH-H     | Switzerland    | 47.558, 8.863  | Whole Genome | 1               | 0        | 1            |
| P1013 | PL-1     | Poland         | 52.212, 21.001 | Whole Genome | 0               | 0        | 1            |
| P1029 | BE-KN    | Belgium        | 51.357, 3.343  | Whole Genome | 0               | 0        | 0            |
| P1036 | FI-SEG1  | Finland        | 59.764, 23.374 | Whole Genome | 0               | 0        | 0            |
| P1042 | DE-L1    | Germany        | 54.222, 10.429 | Whole Genome | 0               | 0        | 1            |
| P1044 | DE-KN1   | Germany        | 54.169, 10.773 | Whole Genome | 0               | 0        | 0            |
| P15   | BE-OM2   | Belgium        | 50.863, 4.721  | Whole Genome | 0               | 1        | 0            |
| P2009 | RU-SYR1  | Russia         | 53.212, 48.488 | Whole Genome | 0               | 0        | 0            |
| P2022 | FI-SEG1  | Finland        | 59.764, 23.374 | Whole Genome | 0               | 1        | 0            |
| P2031 | DE-KN1   | Germany        | 54.169, 10.773 | Whole Genome | 0               | 0        | 0            |
| P2040 | GB-S8    | England        | 51.621, -1.376 | Whole Genome | 0               | 0        | 0            |
| P3005 | RU-SYR1  | Russia         | 53.212, 48.488 | Whole Genome | 0               | 0        | 0            |
| P3010 | CZ-1     | Czech Republic | 50.125, 14.869 | Whole Genome | 0               | 0        | 1            |
| P3019 | DE-KN1   | Germany        | 54.169, 10.773 | Whole Genome | 0               | 0        | 0            |
| P3020 | BE-WH2   | Belgium        | 51.335, 3.348  | Whole Genome | 0               | 0        | 0            |
| P3034 | CH-H     | Switzerland    | 47.558, 8.863  | Whole Genome | 0               | 0        | 0            |
| P4048 | RU-M1    | Russia         | 55.763, 37.582 | Whole Genome | 0               | 0        | 0            |
| P4054 | RU-RT1   | Russia         | 45.222, 36.808 | Whole Genome | 0               | 0        | 0            |
| P4059 | GB-S8    | England        | 51.621, -1.376 | Whole Genome | 0               | 1        | 0            |
| P1003 | CH-H     | Switzerland    | 47.558, 8.863  | Pcl7         | 1               | NA       | NA           |
| P1006 | RU-BN    | Russia         | 50.248, 43.65  | Pcl7         | 1               | NA       | NA           |
| P1059 | RU-M1    | Russia         | 55.763, 37.582 | Pcl7         | 1               | NA       | NA           |
| P2037 | GB-K1    | England        | 55.703, -2.341 | Pcl7         | 1               | NA       | NA           |
| P3    | FI-VW2   | Finland        | 59.83, 23.201  | Pcl7         | 1               | NA       | NA           |
| P37   | IL-NS    | Israel         | 31.724, 34.626 | Pcl7         | 1               | NA       | NA           |
| P4008 | GB-A1    | England        | 51.878, -1.116 | Pcl7         | 1               | NA       | NA           |
| P4025 | FI-SEG2  | Finland        | 59.764, 23.375 | Pcl7         | 1               | NA       | NA           |
| P4058 | FI-VW5   | Finland        | 59.83, 23.201  | Pcl7         | 1               | NA       | NA           |
| P1008 | GB-A1    | England        | 51.878, -1.116 | Pcl7         | 0               | NA       | NA           |
| P1012 | PL-1     | Poland         | 52.212, 21.001 | Pcl7         | 0               | NA       | NA           |
| P1014 | PL-1     | Poland         | 52.212, 21.001 | Pcl7         | 0               | NA       | NA           |
| P1015 | PL-1     | Poland         | 52.212, 21.001 | Pcl7         | 0               | NA       | NA           |
| P1017 | RU-SYR1  | Russia         | 53.212, 48.488 | Pcl7         | 0               | NA       | NA           |
| P1023 | GB-A1    | England        | 51.878, -1.116 | Pcl7         | 0               | NA       | NA           |
| P1024 | GB-A1    | England        | 51.878, -1.116 | Pcl7         | 0               | NA       | NA           |
| P1027 | GB-S17   | England        | 51.622, -1.367 | Pcl7         | 0               | NA       | NA           |
| P1028 | GB-S17   | England        | 51.622, -1.367 | Pcl7         | 0               | NA       | NA           |
| P1032 | GB-C1    | England        | 51.734, -1.336 | Pcl7         | 0               | NA       | NA           |
| P2    | GB-K1    | England        | 55.703, -2.341 | Pcl7         | 0               | NA       | NA           |
| P2003 | CH-H     | Switzerland    | 47.558, 8.863  | Pcl7         | 0               | NA       | NA           |
| P2008 | RU-BN    | Russia         | 50.248, 43.65  | Pcl7         | 0               | NA       | NA           |
| P2012 | RU-SYR1  | Russia         | 53.212, 48.488 | Pcl7         | 0               | NA       | NA           |
| P2025 | FI-SEG2  | Finland        | 59.764, 23.375 | Pcl7         | 0               | NA       | NA           |
| P2033 | DE-N1    | Germany        | 54.309, 10.625 | Pcl7         | 0               | NA       | NA           |
| P3025 | RU-RT1   | Russia         | 45.222, 36.808 | Pcl7         | 0               | NA       | NA           |
| P4007 | RU-BN    | Russia         | 50.248, 43.65  | Pcl7         | 0               | NA       | NA           |
| P4014 | CZ-1     | Czech Republic | 50.125, 14.869 | Pcl7         | 0               | NA       | NA           |
| P4021 | BE-KN2   | Belgium        | 51.356, 3.335  | Pcl7         | 0               | NA       | NA           |
| P4028 | DE-L1    | Germany        | 54.222, 10.429 | Pcl7         | 0               | NA       | NA           |
| P4046 | BE-WH2   | Belgium        | 51.335, 3.348  | Pcl7         | 0               | NA       | NA           |
| P4060 | GB-S8    | England        | 51.621, -1.376 | Pcl7         | 0               | NA       | NA           |



**Supplementary Table 2:** *D. magna* test clones for infection phenotyping, including their geographic origin and their resistance phenotype to two common lab clones of *P. ramosa* (C1 & C19).

| <b><i>D. magna</i> Clone Name</b> | <b>Resistotype (C1/C19)</b> | <b>Geographic Origin</b> |
|-----------------------------------|-----------------------------|--------------------------|
| FI-KELA-39-9                      | SR                          | Tvärminne, Finland       |
| FI-XINB3                          | RS                          | Tvärminne, Finland       |
| DE-K1-IINB1                       | RR                          | Munich, Germany          |
| HU-HO-2                           | SS                          | Bogarzo-to, Hungary      |
| CH-H-67                           | SS                          | Hohliberg, Switzerland   |
| CH-H-159                          | RR                          | Hohliberg, Switzerland   |



**Supplementary Table 3:** Nucleotide diversity ( $\pi$ ) of annotated genome regions (100-b.p. windows) in the top 99<sup>th</sup> diversity percentile across the 24 genome-sequenced *P. ramosa* clones.

| Chromosome Starting Position | Annotation                  | Nucleotide Diversity ( $\pi$ ) |
|------------------------------|-----------------------------|--------------------------------|
| 8901                         | PCL7                        | 0.0463768                      |
| 9001                         | PCL7                        | 0.0469252                      |
| 9101                         | PCL7                        | 0.0399608                      |
| 9201                         | PCL7                        | 0.0655902                      |
| 10301                        | PCL8                        | 0.0515715                      |
| 10401                        | PCL8                        | 0.0423551                      |
| 10501                        | PCL8                        | 0.044058                       |
| 63301                        | PCL3                        | 0.0438768                      |
| 88101                        | PCL22                       | 0.0724267                      |
| 88201                        | PCL22                       | 0.0582949                      |
| 88401                        | PCL22                       | 0.0425635                      |
| 88601                        | PCL22                       | 0.0379515                      |
| 89001                        | PCL21                       | 0.054453                       |
| 89401                        | PCL21                       | 0.0457622                      |
| 89801                        | PCL21                       | 0.0500546                      |
| 89901                        | PCL21                       | 0.0438685                      |
| 316801                       | PCL27                       | 0.0527608                      |
| 318701                       | PCL28                       | 0.0389855                      |
| 318901                       | PCL28                       | 0.0387965                      |
| 319001                       | PCL28                       | 0.0404348                      |
| 323501                       | hypothetical protein        | 0.0517993                      |
| 697501                       | hypothetical protein        | 0.0379495                      |
| 1033001                      | hypothetical protein        | 0.0398386                      |
| 1200101                      | PCL16                       | 0.0400858                      |
| 1201201                      | PCL16                       | 0.0393478                      |
| 1202401                      | PCL16                       | 0.0436594                      |
| 1518101                      | PCL24                       | 0.0404978                      |
| 1518201                      | PCL24                       | 0.052136                       |
| 1518501                      | PCL24                       | 0.0384699                      |
| 1518601                      | PCL24                       | 0.0660113                      |
| 1518701                      | PCL24                       | 0.0540388                      |
| 1518801                      | PCL24                       | 0.0432896                      |
| 1519001                      | PCL25                       | 0.0506445                      |
| 1519401                      | PCL25                       | 0.0387319                      |
| 1519501                      | PCL25                       | 0.0670124                      |
| 1519601                      | PCL25                       | 0.0393056                      |
| 1519701                      | PCL25                       | 0.0390438                      |
| 1519801                      | PCL25                       | 0.0446108                      |
| 1519901                      | PCL25                       | 0.0670554                      |
| 1520601                      | PCL26                       | 0.0440213                      |
| 1520801                      | PCL26                       | 0.0826377                      |
| 1571101                      | hypothetical protein        | 0.0422779                      |
| 1571201                      | PCL9                        | 0.0580719                      |
| 1577901                      | PCL12                       | 0.0495656                      |
| 1578201                      | PCL12                       | 0.0919916                      |
| 1578301                      | PCL12                       | 0.0437067                      |
| 1578401                      | PCL12                       | 0.0463719                      |
| 1580801                      | PCL14                       | 0.0435965                      |
| 1581001                      | PCL14                       | 0.0410002                      |
| 1588301                      | PCL37                       | 0.0480666                      |
| 1589301                      | PCL36                       | 0.0425605                      |
| 1589401                      | PCL36                       | 0.0380611                      |
| 1600301                      | xylanase/chitin deacetylase | 0.0457971                      |
